# Supplementary material for: Spread of Jacobaea vulgaris and Occurrence of Pyrrolizidine Alkaloids in Regionally Produced Honeys from Northern Germany: Inter- and Intra-Site Variations and Risk Assessment for Special Consumer Groups
Source: MDPI journal article supplement (doi:10.3390/toxins12070441), 2020-07-07
Supplement: s1 [file s1]

# Supplementary Materials: Spread of *Jacobaea vulgaris* and Occurrence of Pyrrolizidine Alkaloids in Regionally Produced Honeys from Northern Germany: Inter- and Intra-Site Variations and Risk Assessment for Special Consumer Groups

Christoph Gottschalk, Florian Kaltner, Matthias Zimmermann, Rainer Korten, Oliver Morris, Karin Schwaiger and Manfred Gareis

**Table S2.** Recovery rates and analytical limits of the LC–MS/MS method for the determination of 25 pyrrolizidine alkaloids (PA) and PA *N*-oxides (PANO) in honey.

| Analyte                        | mean recovery<br>(%)<br>(n=9) | RSD <sub>r</sub><br>(%) | LOD<br>(µg/kg) | LOQ<br>(µg/kg) |
|--------------------------------|-------------------------------|-------------------------|----------------|----------------|
| Echimidine                     | 102.9                         | 6.7                     | 0.14           | 0.46           |
| Echimidine <i>N</i> -oxide     | 110.6                         | 16.2                    | 0.02           | 0.05           |
| Erucifoline                    | 101.8                         | 2.9                     | 0.06           | 0.19           |
| Erucifoline <i>N</i> -oxide    | 81.8                          | 14.1                    | 0.19           | 0.59           |
| Europine                       | 92.9                          | 16.1                    | 0.01           | 0.04           |
| Europine <i>N</i> -oxide       | 102.5                         | 13.0                    | 0.02           | 0.07           |
| Heliotrine                     | 89.5                          | 11.5                    | 0.08           | 0.25           |
| Heliotrine <i>N</i> -oxide     | 107.4                         | 3.7                     | 0.01           | 0.04           |
| Intermedine                    | 88.4                          | 9.2                     | 0.09           | 0.28           |
| Intermedine <i>N</i> -oxide    | 98.7                          | 7.8                     | 0.10           | 0.32           |
| Jacobine                       | 94.0                          | 8.8                     | 0.07           | 0.24           |
| Jacobine <i>N</i> -oxide       | 86.0                          | 13.2                    | 0.01           | 0.04           |
| Lasiocarpine                   | 98.8                          | 15.5                    | 0.01           | 0.03           |
| Lasiocarpine <i>N</i> -oxide   | 110.7                         | 17.4                    | 0.02           | 0.07           |
| Lycopsamine                    | 86.4                          | 6.9                     | 0.02           | 0.06           |
| Lycopsamine <i>N</i> -oxide    | 100.2                         | 5.0                     | 0.03           | 0.07           |
| Monocrotaline                  | 96.1                          | 7.1                     | 0.07           | 0.24           |
| Monocrotaline <i>N</i> -oxide  | 98.4                          | 15.9                    | 0.17           | 0.54           |
| Retrorsine                     | 106.8                         | 7.8                     | 0.04           | 0.13           |
| Retrorsine <i>N</i> -oxide     | 120.8                         | 8.0                     | 0.07           | 0.23           |
| Senecionine                    | 83.0                          | 15.0                    | 0.13           | 0.40           |
| Senecionine <i>N</i> -oxide    | 106.2                         | 7.8                     | 0.02           | 0.06           |
| Seneciphylline                 | 111.2                         | 11.5                    | 0.15           | 0.47           |
| Seneciphylline <i>N</i> -oxide | 92.8                          | 22.6                    | 0.02           | 0.05           |
| Senkirkine                     | 102.4                         | 5.1                     | 0.01           | 0.04           |

RSD<sub>r</sub> intra-day repeatability expressed as relative standard deviation; LOD, limit of detection; LOQ, limit of quantification.

**Table S4.** Substance specific parameters of the LC–MS/MS method for 25 pyrrolizidine alkaloids (PA) and PA *N*-oxides (PANO) ordered by retention time.

| Analyte | Formula                                         | Precursor ion<br>(m/z) | Product ions<br>(m/z) | DP<br>(V) | EP<br>(V) | CE<br>(eV) | CXP<br>(V) | Retention time<br>(min) |
|---------|-------------------------------------------------|------------------------|-----------------------|-----------|-----------|------------|------------|-------------------------|
| Mc      | C <sub>16</sub> H <sub>23</sub> NO <sub>6</sub> | 326.1                  | 121.1                 | 116       | 10        | 41         | 20         | 5.2                     |
|         |                                                 |                        | 120.2                 | 116       | 10        | 49         | 20         |                         |
| Im      | C <sub>15</sub> H <sub>25</sub> NO <sub>5</sub> | 300.2                  | 138.0                 | 96        | 10        | 29         | 24         | 6.4                     |
|         |                                                 |                        | 120.1                 | 96        | 10        | 37         | 20         |                         |
| Ly      | C <sub>15</sub> H <sub>25</sub> NO <sub>5</sub> | 300.2                  | 138.0                 | 96        | 10        | 29         | 24         | 6.9                     |
|         |                                                 |                        | 120.1                 | 96        | 10        | 37         | 20         |                         |
| Eu      | C <sub>16</sub> H <sub>27</sub> NO <sub>6</sub> | 330.1                  | 138.0                 | 86        | 10        | 41         | 6          | 8.8                     |
|         |                                                 |                        | 156.1                 | 86        | 10        | 41         | 8          |                         |
| McN     | C <sub>16</sub> H <sub>23</sub> NO <sub>7</sub> | 342.1                  | 137.1                 | 116       | 10        | 41         | 24         | 9.9                     |
|         |                                                 |                        | 120.1                 | 116       | 10        | 51         | 20         |                         |
| ImN     | C <sub>15</sub> H <sub>25</sub> NO <sub>6</sub> | 316.2                  | 172.1                 | 61        | 10        | 41         | 30         | 9.9                     |
|         |                                                 |                        | 138.1                 | 61        | 10        | 41         | 24         |                         |
| EuN     | C <sub>16</sub> H <sub>27</sub> NO <sub>7</sub> | 346.2                  | 172.1                 | 106       | 10        | 45         | 30         | 9.8                     |
|         |                                                 |                        | 270.1                 | 106       | 10        | 35         | 16         |                         |
| LyN     | C <sub>15</sub> H <sub>25</sub> NO <sub>6</sub> | 316.2                  | 172.1                 | 106       | 10        | 41         | 30         | 10.0                    |
|         |                                                 |                        | 138.0                 | 106       | 10        | 41         | 24         |                         |
| Ec      | C <sub>18</sub> H <sub>23</sub> NO <sub>6</sub> | 350.2                  | 120.1                 | 111       | 10        | 43         | 20         | 10.7                    |
|         |                                                 |                        | 138.1                 | 111       | 10        | 49         | 20         |                         |
| Jb      | C <sub>18</sub> H <sub>25</sub> NO <sub>6</sub> | 352.1                  | 120.1                 | 111       | 10        | 43         | 20         | 11.2                    |
|         |                                                 |                        | 280.2                 | 111       | 10        | 33         | 16         |                         |
| Ht      | C <sub>16</sub> H <sub>27</sub> NO <sub>5</sub> | 314.2                  | 138.2                 | 86        | 10        | 41         | 36         | 12.7                    |
|         |                                                 |                        | 94.0                  | 86        | 10        | 41         | 16         |                         |
| JbN     | C <sub>18</sub> H <sub>25</sub> NO <sub>7</sub> | 368.2                  | 296.2                 | 111       | 10        | 35         | 16         | 12.7                    |
|         |                                                 |                        | 120.1                 | 111       | 10        | 53         | 20         |                         |
| EcN     | C <sub>18</sub> H <sub>23</sub> NO <sub>7</sub> | 366.2                  | 118.0                 | 111       | 10        | 49         | 20         | 12.7                    |
|         |                                                 |                        | 120.1                 | 111       | 10        | 45         | 22         |                         |
| Rs      | C <sub>18</sub> H <sub>25</sub> NO <sub>6</sub> | 352.1                  | 138.1                 | 121       | 10        | 43         | 24         | 12.9                    |
|         |                                                 |                        | 324.3                 | 121       | 10        | 39         | 18         |                         |
| HtN     | C <sub>16</sub> H <sub>27</sub> NO <sub>6</sub> | 330.2                  | 172.1                 | 106       | 10        | 41         | 30         | 13.6                    |
|         |                                                 |                        | 93.7                  | 106       | 10        | 63         | 16         |                         |
| Sp      | C <sub>18</sub> H <sub>23</sub> NO <sub>5</sub> | 334.1                  | 120.1                 | 111       | 10        | 41         | 20         | 14.1                    |
|         |                                                 |                        | 94.1                  | 111       | 10        | 51         | 16         |                         |
| RsN     | C <sub>18</sub> H <sub>25</sub> NO <sub>7</sub> | 368.2                  | 118.1                 | 111       | 10        | 47         | 20         | 14.1                    |
|         |                                                 |                        | 136.0                 | 111       | 10        | 51         | 22         |                         |
| Sc      | C <sub>18</sub> H <sub>25</sub> NO <sub>5</sub> | 336.2                  | 120.1                 | 116       | 10        | 41         | 20         | 16.9                    |
|         |                                                 |                        | 138.1                 | 116       | 10        | 41         | 24         |                         |
| SpN     | C <sub>18</sub> H <sub>23</sub> NO <sub>6</sub> | 350.2                  | 118.2                 | 116       | 10        | 51         | 20         | 16.9                    |
|         |                                                 |                        | 136.0                 | 116       | 10        | 45         | 24         |                         |
| Em      | C <sub>20</sub> H <sub>31</sub> NO <sub>7</sub> | 398.3                  | 120.1                 | 96        | 10        | 35         | 20         | 18.1                    |
|         |                                                 |                        | 119.5                 | 96        | 10        | 37         | 42         |                         |
| ScN     | C <sub>18</sub> H <sub>25</sub> NO <sub>6</sub> | 352.1                  | 118.1                 | 116       | 10        | 41         | 20         | 18.3                    |
|         |                                                 |                        | 136.0                 | 116       | 10        | 53         | 24         |                         |
| Sk      | C <sub>19</sub> H <sub>27</sub> NO <sub>6</sub> | 366.2                  | 122.1                 | 121       | 10        | 49         | 20         | 18.4                    |
|         |                                                 |                        | 153.0                 | 121       | 10        | 37         | 26         |                         |
| EmN     | C <sub>20</sub> H <sub>31</sub> NO <sub>8</sub> | 414.2                  | 254.2                 | 106       | 10        | 43         | 14         | 18.4                    |
|         |                                                 |                        | 352.2                 | 106       | 10        | 35         | 20         |                         |
| Lc      | C <sub>21</sub> H <sub>33</sub> NO <sub>7</sub> | 412.2                  | 120.1                 | 101       | 10        | 45         | 22         | 19.5                    |
|         |                                                 |                        | 220.1                 | 101       | 10        | 27         | 12         |                         |
| LcN     | C <sub>21</sub> H <sub>33</sub> NO <sub>8</sub> | 428.2                  | 137.1                 | 111       | 10        | 47         | 24         | 20.1                    |
|         |                                                 |                        | 138.1                 | 111       | 10        | 45         | 24         |                         |

Ec, erucifoline; EcN, erucifoline *N*-oxide; Em, echimidine; EmN, echimidine *N*-oxide; Eu, europine; EuN, europine *N*-oxide; Ht, heliotrine; HtN, heliotrine *N*-oxide; Im, intermedine; ImN, intermedine *N*-oxide; Jb, jacobine; JbN, jacobine *N*-oxide; Lc, lasiocarpine; LcN, lasiocarpine *N*-oxide; Ly, lycopsamine; LyN, lycopsamine *N*-oxide; Mc, monocrotaline; McN, monocrotaline *N*-oxide; Rs, retrorsine; RsN, retrorsine *N*-oxide; Sc, senecionine; ScN, senecionine *N*-oxide; Sp, seneciphylline; SpN, seneciphylline *N*-oxide; Sk, senkirkine.
