# Supplementary material for: Spread of Jacobaea vulgaris and Occurrence of Pyrrolizidine Alkaloids in Regionally Produced Honeys from Northern Germany: Inter- and Intra-Site Variations and Risk Assessment for Special Consumer Groups
Source: MDPI journal article supplement (doi:10.3390/toxins12070441), 2020-07-07
Supplement: s1 [file s1]

# Supplementary Materials: Spread of *Jacobaea vulgaris* and Occurrence of Pyrrolizidine Alkaloids in Regionally Produced Honeys from Northern Germany: Inter- and Intra-Site Variations and Risk Assessment for Special Consumer Groups

Christoph Gottschalk, Florian Kaltner, Matthias Zimmermann, Rainer Korten, Oliver Morris, Karin Schwaiger and Manfred Gareis

**Table S1.** Studies on the occurrence of pyrrolizidine alkaloids (PA) and PA N-oxides (PANO) in honey (raw bulk honey, regionally produced honey and blended retail products) in chronologic order.

| Study (year)             | Sample type                                                        | N    | % positive | Origin                | Mean PA/PANO level (µg/kg) | Range PA/PANO sum level (µg/kg) | Method   | Number of analytes      |
|--------------------------|--------------------------------------------------------------------|------|------------|-----------------------|----------------------------|---------------------------------|----------|-------------------------|
| Deinzer et al. (1977)    | bulk honey ( <i>Jacobaea vulgaris</i> -sourced)                    | 4    | 100        | North America         | not reported               | 300–3900                        | LC–MS    | 6                       |
| Culvenor et al. (1981)   | bulk honey ( <i>Echium plantagineum</i> -sourced)                  | 5    | 100        | Australia             | not reported               | 270–950                         | GC–MS    | 7                       |
| Crews et al. (1997)      | bulk honey ( <i>Jacobaea vulgaris</i> -sourced)                    | 15   | 53         | United Kingdom        | not reported               | <LOD–1480                       | LC–MS    | 5                       |
| Beales et al. (2004)     | bulk honey ( <i>Heliotropium</i> spp./ <i>Echium</i> spp.-sourced) | 28   | 100        | Australia             | not reported               | 25–2634                         | LC–MS/MS | 17                      |
|                          | bulk honey                                                         | 35   | 46         |                       |                            | <LOD–814                        |          |                         |
|                          | retail honey                                                       | 5    | 80         |                       |                            | <LOD–1263                       |          |                         |
| Betteridge et al. (2005) | retail honey                                                       | 9    | 78         | New Zealand           | 790                        | <LOD–2850                       | LC–MS/MS | 15                      |
| Kempf et al. (2008)      | retail honey                                                       | 216  | 8,8        | EU/non-EU             | 56                         | <LOD–120                        | GC–MS    | retronecine equivalents |
| Dübecke et al. (2011)    | retail honey                                                       | 696  | 94         | EU/non-EU             | 26                         | <LOD–267                        |          |                         |
|                          | bulk honey                                                         | 2839 | 68         | Central/South America | 67                         | <LOD–1087                       | LC–MS/MS | 10                      |

|                               |                                                 |        |     |                       |              |             |               |                         |
|-------------------------------|-------------------------------------------------|--------|-----|-----------------------|--------------|-------------|---------------|-------------------------|
|                               | bulk honey                                      | 381    | 65  | EU                    | 26           | <LOD–225    |               |                         |
| BfR (2011)                    | retail honey                                    | 1324   | 91  | EU/non-EU             | 21.4         | <LOD–267    | LC–MS/MS      | 14/18                   |
|                               | bulk honey                                      | 13,280 | 74  | EU/non-EU             | 55           | <LOD–3298   |               |                         |
| Kempf et al. (2011)           | retail honey                                    | 8      | 75  | EU/non-EU             | not reported | <LOD–625    |               |                         |
|                               | retail honey                                    | 8      | 100 | New Zealand           | not reported | 334–520     | GC–MS         | retronecine equivalents |
|                               | bulk honey ( <i>Jacobaea vulgaris</i> -sourced) | 31     | 87  | The Netherlands       | 1261         | <LOD–13,019 |               |                         |
| Orantes-Bermejo et al. (2013) | regionally produced honey                       | 103    | 94  | Spain                 | 48           | <LOD–237    | LC–MS/MS      | 17                      |
| Griffin et al. (2013)         | retail honey                                    | 50     | 16  | EU/non-EU             | 1260         | <LOD–5614   | LC–MS/MS      | 11                      |
| Kast et al. (2014)            | retail honey                                    | 71     | 54  | Switzerland           | 3.6          | <LOD–55     | LC–MS/MS      | 18                      |
| Martinello et al. (2014)      | retail honey                                    | 17     | 53  | Italia                | 1.4          | <LOD–7.0    |               |                         |
|                               |                                                 | 22     | 50  | EU                    | 3.1          | <LOD–23     | LC–MS         | 9                       |
|                               |                                                 | 31     | 77  | EU/non EU             | 17           | <LOD–172    |               |                         |
| Bodi et al. (2014)            | regionally produced honey                       | 15     | 47  | Germany/Austria       | 6.1          | <LOD–28     | LC–MS/MS      | 17                      |
|                               | retail honey                                    | 72     | 93  | EU/non-EU             | 13           | <LOD–235    |               |                         |
| Griffin et al. (2015 a)       | retail honey                                    | 59     | 69  | Australia/New Zealand | 153          | <LOD–932    | LC–MS/MS      | 14                      |
| Griffin et al. (2015 b)       | retail honey                                    | 150    | 23  | EU/non-EU             | not reported | < LOD–545   | LC–MS/MS      | 14                      |
| Lorena et al. (2016)          | bulk honey                                      | 60     | 28  | Italy                 | not reported | <LO–18      | LC–MS/MS      | 6                       |
| Valese et al. (2016)          | retail honey                                    | 92     | 99  | Brazil                | not reported | <LOD–423    | LC–MS/MS      | 8                       |
| Neumann and Huckauf (2016)    | bulk honey                                      | 86     | 54  | Schleswig-Holstein    | 34           | <LOD–604    | LC–MS/MS      | 28                      |
| Letsyo et al. (2017)          | regionally produced honey                       | 48     | 85  | Ghana                 | 283          | <LOD–2639   | GC–MS         | retronecine equivalents |
| Kowalczyk et al. (2018)       | regionally produced honey                       | 40     | 68  | Poland                | 4.5          | <LOD–20     | GC–MS         | retronecine equivalents |
|                               | retail honey                                    | 14     | 93  | Asia                  | 23           | <LOD–64     |               |                         |
| Hungerford et al. (2019)      | retail honey                                    | 465    | 84  | Australia             | 280          | <LOD–3300   | HR–UPLC–MS/MS | 30                      |

|                            |                           |    |     |                  |              |           |               |    |
|----------------------------|---------------------------|----|-----|------------------|--------------|-----------|---------------|----|
| Carpinelli de Jesus (2019) | regionally produced honey | 3  | 100 | Australia        | not reported | 1400–2000 | HR-UPLC–MS/MS | 30 |
| Celano et al. (2019)       | retail honey              | 25 | 100 | Italia/EU/non-EU | not reported | 0.2–17.5  | UPLC–MS/MS    | 9  |
